## 15 **Abstract**

16           The ability of single-celled microbes to integrate environmental signals and control gene  
17 expression enables calculated decisions on whether they should invest in a behavior in a specific  
18 environment. But how can the same mechanisms of gene expression control—resulting from  
19 individuals sensing, integrating and responding to diffusible cues in dynamic, densely  
20 populated microbial communities—enable the evolution and stability of cooperative behaviors  
21 that could easily be exploited by cheaters? Here we combine fluorescent imaging with  
22 computational analyses to investigate how the micro-environment experienced by cells in  
23 spatially-structured systems impacts cooperative behavior. We focus on swarming in the  
24 opportunistic human pathogen *Pseudomonas aeruginosa*, a behavior that requires cooperative  
25 secretions of rhamnolipid surfactants to facilitate collective movement over surfaces. Our  
26 analysis shows that the expression of rhamnolipid synthesis varies across the colony and, counter  
27 to previous knowledge, peaks at tips of swarming tendrils. To dissect the contribution of  
28 competing diffusive inputs—quorum sensing signals and growth-limiting nutrients—we adapted  
29 the classic Colony Forming Unit (CFU) assay to record colony growth and gene expression  
30 dynamics across thousands of colonies. We found these cells capable of centimeter-scale  
31 communication in a pattern of gene expression previously undetected in liquid culture systems.  
32 Validation experiments where we manipulated gene expression by flooding the environment  
33 with quorum sensing signals could accelerate the onset of swarming, but the cooperative trait  
34 remained robust to cheaters. Taken together, these results shed new light on the integration of  
35 diffusible signals that stabilizes swarming motility, a cooperative microbial behavior.

36

## 37 **Introduction**

38            Cooperation between cells allows microbes to contribute to multicellular communities  
39 ranging from antibiotic resistant biofilms (Costerton et al. 1999; Lee et al. 2010), fruiting bodies  
40 (Velicer and Vos 2009), swarming motility (Yan et al. 2019) and impact macroscopic organisms  
41 in ways that no individual microbe alone could (Singh et al. 2000; Rutherford and Bassler 2012).  
42 However, the microenvironments experienced by individual microbes living inside a densely  
43 microbial community are dynamic, densely packed and competitive (Granato et al. 2019).  
44 Cooperative traits can come at a cost to individuals because they require resources that could  
45 otherwise be used to grow (Griffin et al. 2004). How can microbial cooperative traits evolve and  
46 remain stable in nature in the competitive environment of bacterial communities? Understanding  
47 the cell-level computation that leads to evolutionary robustness of cooperative behaviors remains  
48 an open problem in sociomicrobiology. Spatial structure is key to the evolution of cooperation.  
49 Even a costly cooperative trait can be preserved as long as the benefits of cooperating can be  
50 localized to regions of highly related individuals (Nadell et al. 2010; Nadell et al. 2013; Kim et  
51 al. 2014; Drescher et al. 2014).

52            Microbes have the ability to sense, integrate and respond to diffusible queues by  
53 changing their gene expression. The concentrations of diffusible molecules that cells consume  
54 (such as nutrients) or produce (such as quorum sensing signals) change in time and with the  
55 dynamics of the rest of the surrounding cellular community. The spatial distribution of growth-  
56 limiting resources influences the development of structured populations, even in macroscopic  
57 communities: Vegetation growing in arid landscapes where water is the most limiting resource  
58 often show spatially structured patterning (Lejeune et al. 2004; Rietkerk et al. 2002; Rietkerk et  
59 al. 2004). The interactions between plants in arid environments can be described using an

60 ecological kernel, where positive interactions represent nutrient preservation and negative ones,  
61 nutrient competition. Ecological kernels can also provide insights into the spatial structure of  
62 microbial communities (Deng et al. 2014), by describing how competing diffusible signals—  
63 growth limiting nutrients and quorum sensing signals—can influence the expression of a  
64 cooperative gene.

65         Here we investigate how the environment experienced by microbes influences their  
66 dynamics of cooperative behavior in spatially structured environments. We focus on the gram-  
67 negative *Pseudomonas aeruginosa*, an opportunistic pathogen often used as a model to study  
68 bacterial social behavior. *P. aeruginosa* builds thick antibiotic resistant biofilms that are life-  
69 threatening lung infections to cystic fibrosis patients and secrete a swath of disease-inducing  
70 virulence factors (Rutherford and Bassler 2012). These bacteria communicate by quorum sensing  
71 and transition between sessile (biofilm) and motile (swarming) life styles (Yan et al. 2019). *P.*  
72 *aeruginosa* swarms are of particular interest for their evolutionary robustness. This cooperative  
73 behavior allows a colony to grow over an order of magnitude larger in final population size  
74 (Xavier et al. 2011) but requires the expression of *rhIA* (Zhu and Rock 2008; Caiazza et al. 2005)  
75 and the subsequent secretion of massive amounts of rhamnolipid biosurfactant molecules  
76 (Caiazza et al. 2005; Déziel et al. 2003) that can amount to 20% of their dry mass (Xavier et al.  
77 2011).

78         Secreted molecules required for swarming become publicly available once released, but  
79 the cooperative behavior remains robust to cheating. Wild type *P. aeruginosa* does not lose in  
80 competition against a  $\Delta rhIA$  mutant unable to produce rhamnolipids thanks to the dynamic  
81 regulation of *rhIA* which integrates of quorum signals and information nutrient availability to  
82 delay expression to times when rhamnolipid secretion becomes affordable (Xavier et al. 2011; de

83 Vargas Roditi et al. 2013; Boyle et al. 2015). The ability to regulate investment in a cooperative  
84 trait to avoid a fitness cost is termed Metabolic Prudence (Xavier et al. 2011), a strategy that may  
85 regulate many bacterial social traits (Xavier et al. 2011; Mellbye and Schuster 2014; Smith and  
86 Schuster 2019).

87 Rhamnolipids are a high carbon-content compound. Experiments tracking gene  
88 expression in liquid culture showed that if cells run out of carbon source, they shut off *rhlA*  
89 expression. When cells run out of either nitrogen or iron instead, cells ramp up *rhlA* expression  
90 and allocate carbon towards rhamnolipid synthesis. This is presumably to facilitate movement to  
91 more nutrient rich locations at no fitness cost. Adding quorum signals to the medium also  
92 amplifies *rhlA* gene expression in liquid culture, particularly when the cells are in early  
93 stationary phase (Boyle et al. 2015).

94 The regulation of *rhlAB* expression integrates nutrient and quorum signal information and  
95 depends on at least three diffusible molecules: a growth-limiting nutrient, and the hierarchical  
96 quorum sensing structure involving the quorum signal molecules 3-oxo-C12-HSL and C4-HSL  
97 (Latifi et al. 1996; Pearson et al. 1997; Ochsner and Reiser 1995; Ochsner et al. 1994; Wagner et  
98 al. 2003; Medina et al. 2003). According to the literature, all three diffusive inputs, the two auto-  
99 inducers as well as any small molecule growth-limiting nutrient, act on similar length/time  
100 scales. In addition, the ratio of the diffusion coefficients and decay rates for these molecules in  
101 bacterial growth media (Cornforth et al. 2014) indicate that the quorum signals could achieve  
102 high enough levels to reach and influence biomass that is multiple millimeters away. Still, the  
103 diffusible species may compete in their control of gene expression: growth nutrients such as  
104 nitrogen and iron should downregulate *rhlAB* whereas quorum sensing signals should upregulate

105 *rhlAB*. The regulation of *rhlAB* in a spatially structured system may be quite complex and  
106 sensitive to environmental fluctuation.

107         Considering the initial seeding of a swarming assay, at the center of an agar plate, we  
108 hypothesized that the nutrient environment would deplete in the center of the swarm first and  
109 then proceed outward, standard to population motility theory, with the region of active growth  
110 localized to the edge of the swarming tendrils at the interface between the population and growth  
111 limiting resources (Deforet et al. 2019). We expected quorum signals to follow the reverse  
112 pattern, building first in the center of the swarm with lowest levels at the swarming tendrils tips.  
113 Given liquid culture literature, this lead to a hypothesis where rhamnolipids are largely being  
114 produced at the center of a swarm, where quorum signals are high and growth rate is low, with  
115 minimal production at the tendrils tips where quorum signals are low and growth rate is high.

116         Here we analyze image timeseries of *P. aeruginosa* swarms fluorescently labeled for  
117 biomass production and *PrhlAB* activity (Supplementary Figures 1-3, and 5). We find that,  
118 contrary to our hypotheses, the edges of swarming tendrils emerge as the regions of highest  
119 cooperative gene expression. To interrogate the role of the diffusive inputs on *rhlAB* expression  
120 in describing this phenotype, we used immotile colonies seeded as in the classic Colony Forming  
121 Unit (CFU) assay to investigate how the interactions between colonies affect rhamnolipid  
122 production. Using these data, we fit an ecological kernel through regularized regression  
123 motivated by reaction-diffusion principles showing that both growth rate information and colony  
124 neighborhood configuration are critical to explain the complex gene expression we observed.  
125 Finally, we show that quorum signals, known to facilitate cellular communication over  
126 micrometer distances (Darch et al. 2018; Connell et al. 2010; Connell et al. 2014), are capable of  
127 centimeter-scale communication between *P. aeruginosa* colonies. Further, while perturbation by

128 quorum signals in liquid culture never showed significant alteration to *rhlAB* expression, the  
129 same perturbation in the spatially structured system surprisingly revealed an over-expression  
130 phenotype that was nonetheless cost-less in both bacterial colonies and motile swarms. Taken  
131 together, these data show that there are new regimes of bacterial gene expression yet to be  
132 unlocked in spatially-structured systems. Our findings reveal new scales of bacterial  
133 communication and new dimension to the evolutionary robustness of bacterial cooperation.

## 134 **Results**

### 135 **Expression of *rhlAB* peaks at the edge of swarming colonies**

136 Competition for nutrient and quorum sensing are two types of cell-cell interactions  
137 mediated by diffusible processes that affect *rhlAB* expression. Their competing influences make  
138 the dynamics of *rhlAB* expression in motile swarms difficult to predict. We constructed a  
139 fluorescent imager inside an incubator to track cell growth and *rhlAB* expression directly in  
140 colonies on Petri dishes (Supplemental Figure 1), using a *P. aeruginosa* PA14 strain with a dual-  
141 label construct harboring PBad-DsRed(EC2) (Pfleger et al. 2005) driven by L-arabinose which  
142 was included in the plate media (Newman and Fuqua 1999) and *PrhlAB*-GFP (van Ditmarsch  
143 and Xavier 2011; Boyle et al. 2015). The constitutive expression of DsRed provided an  
144 indication of the local density of bacteria (Supplemental Figure 2), and the dynamical expression  
145 of GFP reported on the expression of *rhlAB*. The data was corrected for uneven lighting of the  
146 samples (Supplemental Figures 1, 3, see Methods).

147 Using this imaging device we investigated swarming (Figure 1a). Counter to our  
148 expectations, that *rhlAB* expression peaked at the tip of each swarming tendril rather than at the  
149 center of the swarming colony. To confirm this observation, we quantified expression along the

150 length of three tendrils from four independent swarming colonies throughout the time course of  
151 the swarm (Figure 1b). The *rhlAB* expression increased with the distance from the swarm center  
152 in all cases. This dynamic coincides with an unexpected growth phenotype in the swarming  
153 tendrils (as reported by the red signal): The biomass across the entire tendril showed an  
154 exponential growth rate (Figure 1c inset), which was particularly surprising as the average  
155 spreading velocity of the tendril is linear at 3.2mm/h with a standard deviation of 0.8 mm/h.

156 To characterize how an exponential growth rate could emerge in a tendril advancing  
157 linearly, we analyzed three regions within the swarming tendril: the center of the swarm, a fixed-  
158 sized region in the middle of the tendril, and the edge. Pixels were isolated and used to calculate  
159 the average behavior in each region (Figure 1c). These swarms formed tendrils after an average  
160 of 7.25 hours of growth with a standard deviation of 21 minutes. Surprisingly, the biomass level  
161 at the center of a swarm continued to grow exponentially long after tendrils had formed and  
162 started to move away from the initial seeding location. Similarly, the mid-tendril region also  
163 maintained an exponential growth phase both regions showing doubling times of approximately  
164 two hours.

165 The edge of a swarming colony is where fresh nutrients abound and where growth is  
166 presumed to be fastest. However, part of the biomass produced is left behind as the edge of the  
167 tendril as moves forward in a traveling wave (Deforet et al. 2019), and that biomass seeds the  
168 mid tendril. Our observation that the mid tendril maintains exponential growth indicates that the  
169 edge moves forward before the nutrients below are fully consumed.

170 As we do not control for flux of biomass between tendril regions, the growth rate  
171 measured represents a combination of growth and migration into and out of each region.  
172 However, as the general flow of the biomass is away from the swarm center, to first



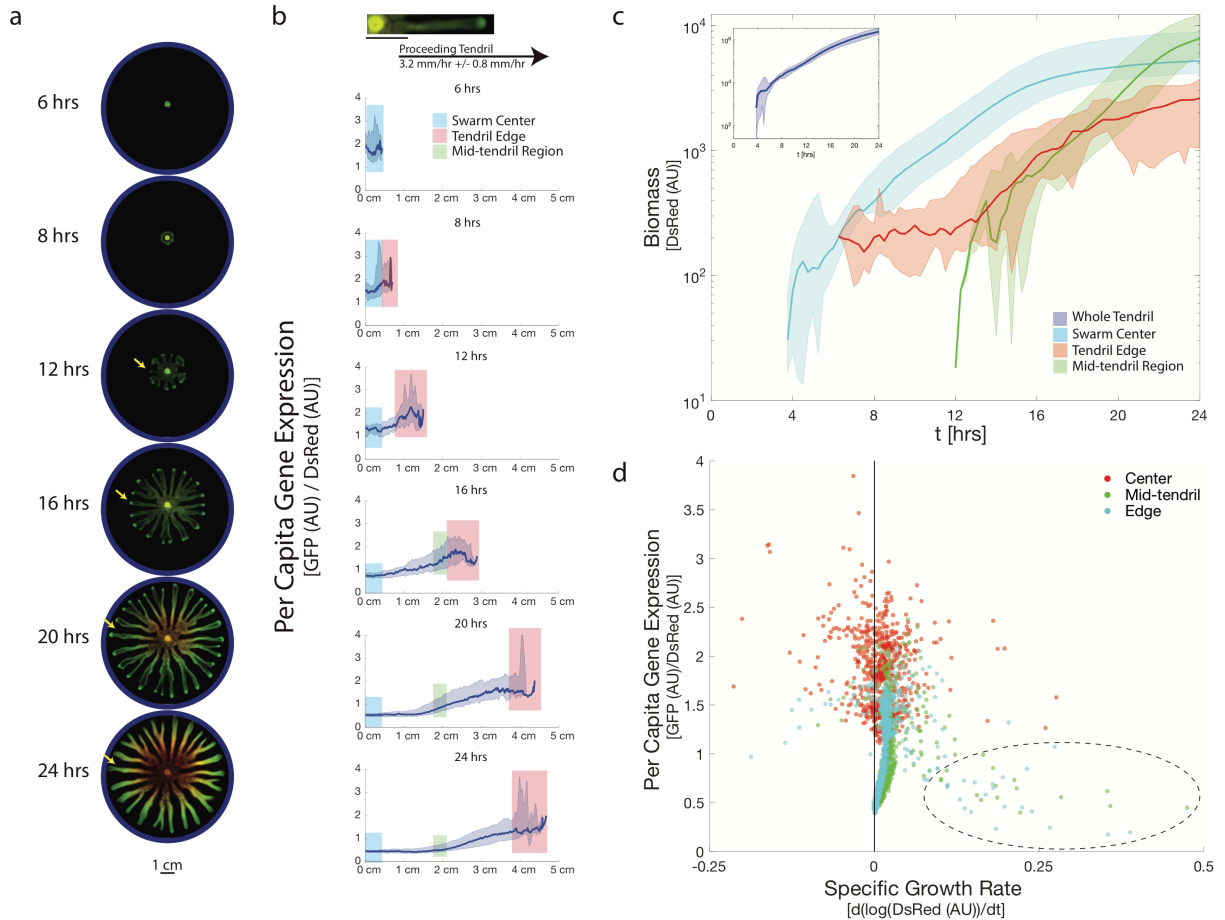

173

174 **Figure 1: Swarming tendrils move with linear velocity, grow exponentially and show spatially segregated**  
 175 **gene expression for rhamnolipid production**

176 **a.** Swarms were imaged in 5-minute intervals across a 24-hour period. Cells are fluorescently labeled for biomass  
 177 (constitutive marker for biomass PBad-DsRed (EC2) induced by L-arabinose in the plate media) (red channel) and  
 178 activity of the *rhlAB* operon (through the promoter fusion *PrhLAB-GFP*) (green channel). Images of selected  
 179 timepoints were background corrected (see Methods) and are contrasted to the maximum intensity found in all  
 180 images in the timeseries. **b.** Per capita gene expression is tracked by the ratio of GFP (*PrhLAB-GFP*) to DsRed (used  
 181 as a biomass marker) per pixel. Data across three tendrils in each of four independent swarms were combined for  
 182 analysis. We observe that the highest investment is surprisingly found at the edge of the swarm. Median gene  
 183 expression data is highlighted and full range of the data is shaded. Max and min data was smoothed again for  
 184 visualization. All tendrils were aligned to start at the same location for analysis though tendrils reach different final  
 185 lengths. **c. Inset:** Total biomass identified along the length of isolated tendrils with time. We observe that the whole  
 186 tendril appears to sustain an exponential rate of growth throughout the timeseries. **Main Panel:** Biomass with time  
 187 for three sections of the swarm: Center (blue), mid-tendril (cyan) and swarm edge (red) for the same tendrils as in **b.**  
 188 Data normalized for size of region isolated. Median data plotted in bold, area shaded is full range of the data. Max  
 189 and min data was smoothed for visualization. Note that the mid-tendril maintains an exponential growth rate after

190 the edge of the tendril has passed. We also find that the edge of a swarming colony appears to sustain a rate of  
191 increase in localized biomass similar to the mid-tendril. **d.** Per capita gene expression plotted against the growth rate  
192 of each region of the swarm. Growth rate determined as the derivative of the log of the red data. We find the swarm  
193 center and mid-tendril regions have lower per capita gene expression at high growth rate and higher at low growth  
194 rate, consistent with previous reports (Boyle et al. 2015; Xavier et al. 2011). We find that at our lowest observed  
195 growth rates, gene expression drops, consistent with (Boyle et al. 2015). Per capita gene expression at the swarm  
196 edge is noticeably higher than the mid tendril or swarm center, though the variation is not clearly explained by the  
197 growth rate of biomass localized to the swarm tip.

198 approximation the flux into the center or mid tendril can be neglected. The growth rate calculated  
199 for the edge of a tendril likely underestimates the cellular growth rate in that region because there  
200 is unlikely to be flux into the tendril tip, and only flux out of it (the biomass left behind as the  
201 edge moves away from the seeding location).

202 To investigate whether any region of the swarm behaved similarly to expected  
203 metabolically prudent dynamics, we analyzed each region's per capita gene expression with  
204 respect to the corresponding growth rate (Figure 1d). In the center and mid-tendril of the swarm,  
205 we observe that high growth rates correlate with lower levels of per capita gene expression  
206 (Figure 1d dashed circle). This indicates that the cells may indeed be titrating gene expression in  
207 accordance with local nutrient availability as in liquid culture (Boyle et al. 2015). However, at  
208 the edge we find no correlation between *rhlAB* expression and measured growth rate. As we are  
209 likely underestimating the true growth rate of the biomass at the edge, this result was puzzling  
210 given current knowledge of the inherent gene expression control. Overall, locally the swarm  
211 tendril behind the swarm tip seemed to be behaving in accordance with known metabolic  
212 prudence, however, globally the high per capita gene expression localization to the tendril tip  
213 remained unexplained.

214

## 215 **Experiments on hard agar recapitulate spatio-temporal dynamics of *rhlAB*** 216 **expression without the complication of movement**

217 Studying the dynamics of growth and *rhlAB* expression in swarming colonies is  
218 complicated by the difficulty of separating growth rates from motility flux in the regions  
219 examined above. Swarming requires an agar concentration of 0.5%, and increasing the  
220 concentration to 1.5% is enough to prevent swarming (Xavier et al. 2011). In hard agar, a strip of

221 immotile PA14 (Supplementary Figure 4a) revealed the same pattern of *rhlAB* expression in this  
222 immotile model of a tendril with *rhlAB* expression peaking at the edges (Supplemental Figure  
223 4c). However, the immotile tendril was unable to sustain an exponential growth rate  
224 (Supplemental Figure 4b), indicating that this gene expression phenotype may be able to be  
225 explained by the diffusive inputs to this system.

226 To probe the role of solute diffusion on *rhlAB* expression we continued to use hard agar  
227 experiments to prevent motility (Figure 2a). Using extreme dilution of bacterial inocula (Figure  
228 2b) we seeded colony forming units (CFUs) and tracked the development of those colonies from  
229 single cells to mature colonies. We computed growth and *rhlAB* expression for each individual  
230 colony (Supplemental Figure 3, 5). Using a range of experiments, we varied the number of  
231 colonies and their local distribution in each Petri dish to produce thousands of growth and *rhlAB*  
232 expression curves and capture a wide diversity of gene expression behaviors.

233 Our data showed that colonies located in regions of higher local density grew to smaller  
234 colony sizes at 48 hours compared to colonies in less dense regions of the same plate. This is  
235 expected from the effects of nutrient depletion from local crowding (Figure 2d) and can be  
236 captured by the variation in the amount of biomass within a 4.5mm radius neighborhood of each  
237 colony. The *rhlAB* expression curves, however, revealed an unexpected diversity of dynamics  
238 that showed a very complex dependency on local neighborhood. We found that while the peak  
239 per capita gene expression in a focal colony correlated with the amount of biomass within a  
240 4.5mm radius neighborhood, but the correlation between a colony's neighborhood its per capita  
241 gene expression varies in both amplitude and sign with time (Figure 2e).

242 One way to characterize these data was to ascertain how the variation in each colony's  
243 per capita gene expression could be explained by the current state of the system. We

244 hypothesized that if the *rhlAB* expression level of each colony depended only on the focal colony  
245 itself then each colony's *rhlAB* expression signal would correlate with its corresponding biomass  
246 signal. Conversely, if colony-colony interaction played a key role then *rhlAB* expression would  
247 not correlate with the colony's biomass level. To test this, we took the *rhlAB* gene expression at  
248 each timepoint and asked if the variation could be explained by the size of each colony at the  
249 same timepoint. We found that early in our timeseries, *rhlAB* expression does correlate well with  
250 red levels (Figure 2f – Dark Blue Curve). However, later in the timeseries, there is a drop in the  
251 *rhlAB* expression variation that can be explained by the biomass signal. To investigate the  
252 remaining variation we calculated the per capita gene expression by calculating the ratio of the  
253 total green fluorescence to the total red fluorescence for each colony. We find that as the  
254 correlation between the GFP and DsRed signal declines the variation in the ratio that can be  
255 explained by the biomass in a focal colony's 4.5mm neighborhood starts to increase (Figure 2f –  
256 Cyan curve). This analysis indicated that colony-colony interactions may indeed alter the *rhlAB*  
257 expression of each individual colony.

258

## 259 **Growth state alignment and regularized regression quantifies the interaction** 260 **between neighboring colonies**

261 Next we sought to detail the function by which each radius of a focal colony's  
262 neighborhood influenced its *rhlAB* expression. We collected timeseries from colonies started  
263 from single cells, generating thousands of independent experiments in high throughput. Each  
264 colony came above detection by our pipeline at a slightly different time, even among colonies on  
265 the same plate. This made it difficult to understand how two colonies with similar growth  
266

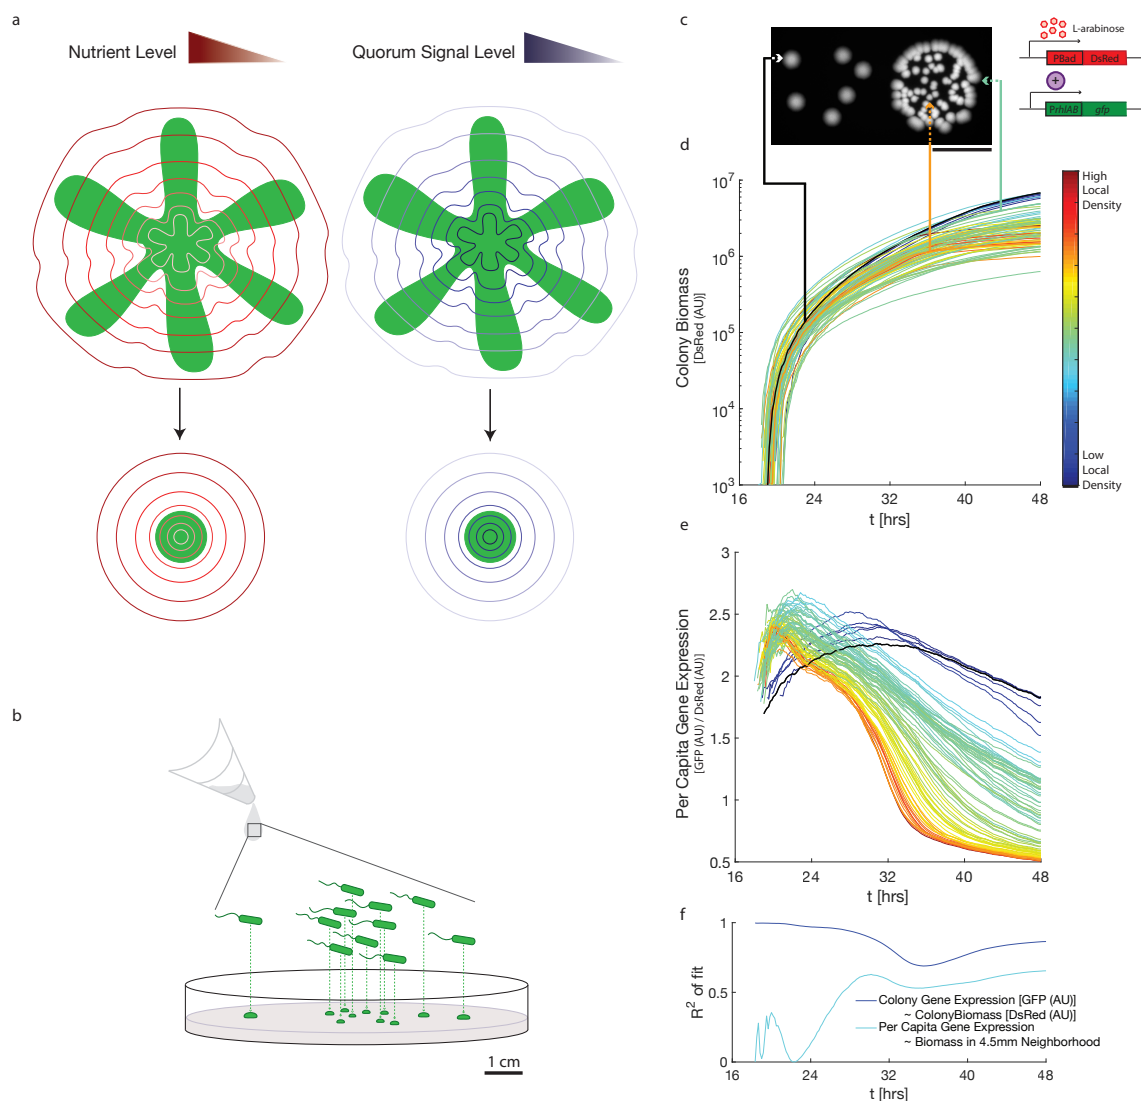

267

268 **Figure 2: Colony Forming Units as a model system for emergent growth and cooperation patterning**

269 **a.** Growth and cooperation dynamics that emerge from nutrient and quorum signal diffusion can be studied in hard  
 270 agar diffusive systems. [Top] Cartoon depicting hypothesized nutrient and quorum signal fields in developed  
 271 swarms. [Bottom] Cartoon depicting the simplified fields predicted of developing colonies. **b.** Method of generation  
 272 for of Colony Forming Unit (CFU) plates. A washed and dilute culture is placed and left to dry on the plate.  
 273 Colonies that emerge were seeded from individual single cells. (See Methods) **c.** CFU image at 48 hours. Data  
 274 characterizes colony biomass as indicated by intensity of the shown DsRed image. Scale bar 1 cm. Colonies  
 275 indicated are highlighted in D and E. Schematic describes fluorescent labeling used. (See Figure 4a for more  
 276 information on the *rhlAB* regulation pathway.) **d.** Analysis of image timeseries (see Methods and Supplementary  
 277 Figure 1-3 and 5) generates a growth curve for each colony. Colony growth trajectories are colored by the number of  
 278 colonies within a 4.5mm radius of the focal colony. Variation in colony growth curves correlates, as expected, with  
 279 spatial configuration. Colonies highlighted demonstrate the variation observed in the dataset. **e.** Colony per capita

280 gene expression of *rhlAB* operon calculated as in Figure 1. Coloration of the expression data as in D reveals that in  
281 this dataset, many neighbors in a 4.5mm radius correlates with an earlier peak in per capita gene expression. **f.**  
282 Explanation of variation observed in colony per capita gene expression. Data at each timepoint is independently  
283 fitted to the indicated model and goodness of fit shown. We observe that much of the variation in colony gene  
284 expression varies with colony biomass (Dark blue curve). However, this correlation decays with time. At later  
285 timepoints, variation in colony per capita gene expression, can be explained by the amount of non-self biomass in a  
286 4.5mm neighborhood around the focal colony. This indicates that the colonies may be able to influence the gene  
287 expression of one another.

288 trajectories (Figure 3b inset) could have such different per capita gene expression patterns  
289 (Figure 3b main panel). However, we noticed that the growth rate of each colony was predictive  
290 of its per capita expression dynamics (Figure 3b main panel). At high growth rate, colonies had  
291 low levels of per capita gene expression. Between a small range of low growth rate, the per  
292 capita gene expression peaked. Below a threshold growth rate, gene expression turned off. Using  
293 this information, we grouped colony data by growth rate. These similarities allowed us to  
294 investigate how the neighborhood surrounding a colony could generate variation in per capita  
295 gene expression.

296 To quantify the colony-colony interaction, we inferred a spatial interaction kernel directly  
297 from our data. We computed the amount of biomass (using the red signal) in concentric  
298 neighborhoods around each focal colony (Figure 3a). These neighborhoods were then used as  
299 features to explain variation in *rhlAB* per capita expression. We grouped data across growth  
300 curves and four independent experiments with similar configurations of colonies by growth rate  
301 (Figure 3b) and we applied ridge regularization to fit three models, one for each growth rate bin  
302 (Figure 3c). The results revealed a complex spatial-temporal pattern of activation and inhibition  
303 that results from the different length-scales of the diffusional factors as the colonies developed.  
304 However, we noticed the coefficients corresponding to the influence of each neighborhood on a  
305 focal colony's behavior showed a pattern: The coefficients of a given neighborhood often shared  
306 the same sign across all three regressions, but differed in amplitude (Figure 3c blue white and red  
307 bar). This may indicate that in a given configuration, there is a fixed spatial interaction kernel  
308 and the colony's growth rate is indicative of the colony's ability to respond to the information in  
309 that kernel.



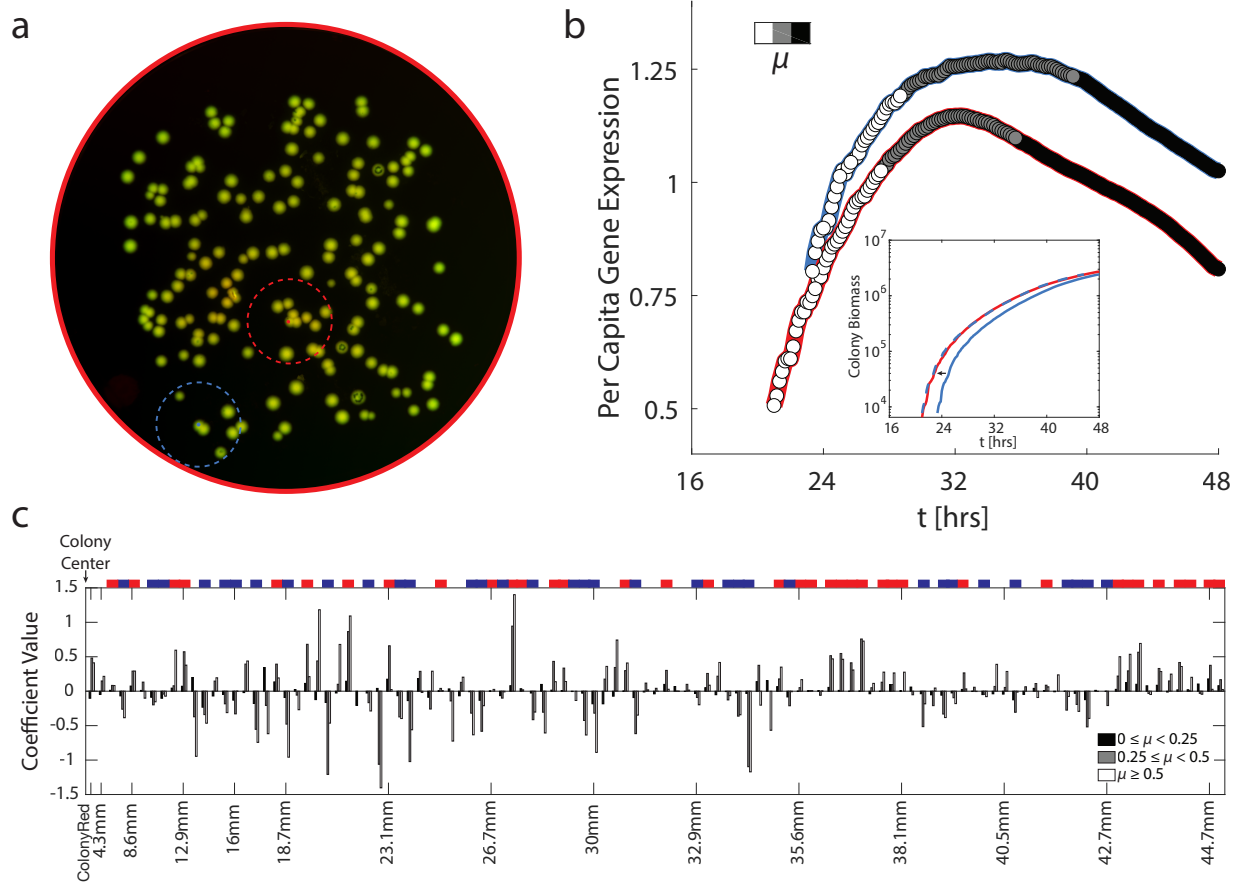

310

311 **Figure 3: The spatio-temporal gene expression patterning from the integration of nutrient and quorum signal**  
 312 **information can be described through a spatial kernel that changes with local density**

313 **a.** Two colonies and respective example neighborhoods, indicated by blue and red dashed circles. **b.** Colonies with  
 314 similar growth curves can show strong differences in gene expression dynamics but similarities appear when data is  
 315 grouped by growth rate. [Inset] Two colonies (the ones indicated in **a**) have similar growth dynamics, as shown by  
 316 the time shifted blue colony curve (dashed blue line). [Main Panel] Per capita gene expression patterns vary between  
 317 the two colonies, however growth rate,  $\mu$ , (high (white), medium (gray), low (black)) correlates with changes in  
 318 gene expression dynamics. Periods of high growth rate correlate with increasing levels of gene expression,  
 319 intermediate growth rates correlate with peak levels of gene expression, and low growth rate correlates with  
 320 declining per capita gene expression. **c.** Ridge regularized results describing the kernel of interaction in each of the  
 321 three growth rate bins. Data across four experiments with configurations like that shown in **a** are included. In  
 322 general, the coefficient describing the influence of biomass in that neighborhood on a focal colony is either positive  
 323 (red) or negative (blue) with the scale of the response varying with the growth rate of the focal colony. Coloration  
 324 above the plot is used whenever all three growth rate bins show the same coefficient sign, inclusive of 0.  $R^2$  values  
 325 in Supplementary Table 1.

326 **Signal-negative mutants validate distance-dependent activation of *rhLAB***  
327 **expression**

328 Next, we sought to confirm that one of the inputs responsible for the rich dynamics in  
329 *rhLAB* expression was a response to quorum signals. To do this, we utilized a mutant unable to  
330 produce the 3-oxo-C12-HSL and C4-HSL signals, PA14  $\Delta lasI \Delta rhII$  double-labeled in the same  
331 way as the WT, as a quorum signal receiver (Figure 4a). To isolate the quorum signal response,  
332 we focused on a colony's response to the C4-HSL molecule, the furthest downstream of the two  
333 quorum signals. Tracking  $P_{rhLAB}$  activity showed whether that colony had sensed both quorum  
334 signals. We added 1 $\mu$ M 3-oxo-C12-HSL to the plate media and placed 4 $\mu$ L of 5 $\mu$ M C4-HSL on  
335 a filter paper on the center of a petri dish and we tracked the growth and *rhLAB* expression in  
336 colonies started from single cells seeded around the filter paper (Figure 4b). The mutant colonies  
337 showed maximal *rhLAB* per capita gene expression at the colony peak that was inversely  
338 proportional to the colony's distance to the filter paper (Figure 4c, d),  $R^2 = 0.37$ . However, there  
339 was a batch effect that corresponded with the number of colonies on the plate where plates with  
340 fewer colonies (light blue data points) showed higher per capita gene expression overall than  
341 colonies with a denser colony seeding (dark blue and black data points).

342

343 **Perturbation with quorum signals reveals a surface-linked expression pattern**  
344 **that scales with distance to the quorum signal source**

345 These experiments carried out with the signal negative mutant confirm that diffusible  
346 quorum signals explain part of the spatio-temporal pattern of *rhLAB* expression. We did not  
347 expect, however, that adding quorum signals to the media would influence the colony behavior

348 of WT bacteria. Previous work done in liquid culture showed no change in total rhamnolipid  
349 production in WT bacteria grown with quorum signals added to the media (Xavier et al. 2011).  
350 Surprisingly, when quorum signals were added to the same plate media recipe, WT colonies  
351 seeded far from each other expressed more *rhlAB* during periods of higher growth rate, even  
352 when compared to other wild type (WT) colonies grown in similar configurations without added  
353 quorum signals (Figure 4e).

354 To understand the discrepancy between the liquid culture versus spatially-structured  
355 colonies, we looked to see if these expression dynamics replicated in the signal mutant. We  
356 found that colonies close to the filter paper expressed *rhlAB* more at high growth rate than those  
357 far from the filter paper source (Figure 4g). This behavior could be quantified by fitting colony  
358 expression at high growth rate with a decaying exponential function (Figure 4f,g). In doing so we  
359 uncovered a threshold-like detection response (Figure 4g). Colonies less than 2.5-3cm from the  
360 quorum signal source show a similar induction pattern with little variation in per capita gene  
361 expression at high growth rate, just as we observed in our WT colonies with supplemented  
362 quorum signals. Farther than 2.5cm away, the exponential decay coefficients vary linearly with  
363 colony distance to the source ( $R^2 = 0.60$ ) and have a very low peak per capita gene expression.  
364

## 365 **Swarming is robust to cheating despite *rhlAB* overexpression by extrinsic** 366 **quorum signals**

367 To test whether this alteration in gene expression carried a cost to cell growth, we  
368 measured colony fitness in three independent ways. First, we looked for a change in the  
369 distribution of growth rates of the colonies in the first time interval after detection. A lower

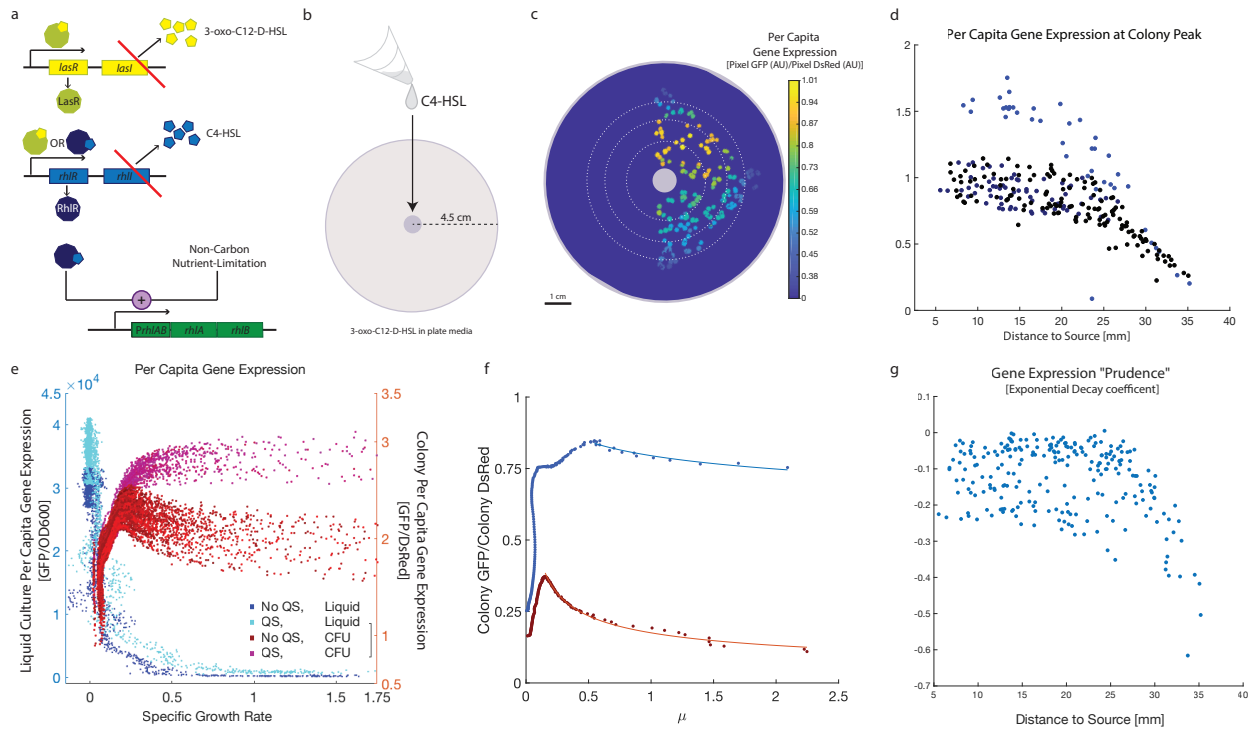

370

371 **Figure 4: Perturbation with quorum signals reveals a spatially-linked expression pattern that scales with**  
 372 **distance to the quorum signal source**

373 **a.** The native molecular circuit determining *rhlA* expression. The molecular circuit and alterations (red lines)  
 374 describes a signal mute quorum signal mutant that is unable to produce the two autoinducer molecules required for  
 375 *rhlA* production. **b.** Experimental design to demonstrate the centimeter length scale of quorum signal response. The  
 376 upstream quorum signal (3-oxo-C12-HSL) is added directly to the plate media and the downstream signal, C4-HSL,  
 377 is loaded on a filter paper in the center of the plate. Colonies have been seeded around the filter paper and will  
 378 respond if the colony observes both quorum signals. **c.** Signal mute colonies respond to diffusible quorum signals.  
 379 Colony borders indicative of colony area after 24 hours of growth. Coloration indicates the maximum per capita  
 380 gene expression achieved throughout the time-course at the colony peak. **d.** Per capita gene expression at colony  
 381 peak correlates with the distance of the colony to the center of the filter paper. Data from three independent  
 382 biological replicates with 40 (blue), 69 (dark blue) and 139 (black) colonies on the plates respectively.  $R^2 = 0.3744$ .  
 383 **e.** Liquid and spatially structured expression patterns with respect to measured growth rate. Liquid culture per capita  
 384 *rhlA* gene expression measured as GFP/OD600 (Xavier et al. 2011) when grown in liquid culture with (Cyan) and  
 385 without (Blue) exogenous quorum signals. There is no clear difference in the per capita gene expression (Blue Axis)  
 386 with quorum signal perturbation in liquid. However, immotile colonies grown without quorum signals (red) and with  
 387 quorum signals in the plate media (magenta) show a clear difference in per capita gene expression (Orange Axis).  
 388 Growth rate is calculated as the derivative of the log(DsRed) data with respect to time. Data for each experimental  
 389 configuration includes three biological replicates. CFU data was taken from plates where colonies were grown at  
 390 low numbers in low local density to minimize colony-colony interactions. Each datapoint represents a time interval  
 391 in a liquid or immotile colony timeseries. **f.** Signal mute mutants closer to the quorum signal source show a higher

392 per capita gene expression regardless of growth rate. These dynamics are shown for two example colonies here.  
393 Colonies are indicated in **c**. To characterize the turn on pattern of this gene expression with respect to growth rate,  
394 we fit an exponential decay curve from high growth rate, to the growth rate with maximal per capita gene  
395 expression. The orange colony at 35.06 mm from the quorum signal source shows a strong correlation between per  
396 capita gene expression and growth rate. By contrast, the blue colony at 7.17 mm from the quorum signal source  
397 shows a response that is roughly independent of the growth rate and has a much smaller in magnitude exponential  
398 decay coefficient. **g**. Colony location relative to the quorum signal source (the filter paper) explains variation in  
399 temporal dynamics of per capita gene expression. Colony gene expression is characterized by the coefficient of the  
400 exponential decay fit of the data from maximal growth rate to maximal investment across the time course. This  
401 analysis reveals that colonies less than 2.5-3cm from the quorum signal source have low exponential decay  
402 coefficients indicating that the per capita expression remains close to the colony's maximum value even during  
403 periods of high growth. Exponential decay coefficients beyond 25mm from the source vary linearly with their  
404 distance to the source with  $R^2 = 0.60$ .

405 growth rate under quorum signal perturbation would have indicated a growth cost prior to  
406 detection. We found no difference between these growth rate distributions in experiments with  
407 and without quorum signal perturbation with colonies in similar configurations nor in plates with  
408 an alternative configuration also perturbed with quorum signals (Figure 5a). Next, we looked for  
409 a difference in the final colony size. If the colonies in the perturbation were smaller at the end of  
410 the timeseries, a growth cost may have occurred in a less obvious way during the time interval of  
411 colony observation. We found instead that the colonies that were grown with added quorum  
412 signals were the same size as colonies grown without quorum signal when in a similar  
413 configuration (Figure 5b). Finally, we looked for a transient cost, a temporal element to the  
414 behavior that could indicate a comparatively different state of growth when comparing datasets  
415 grown with and without quorum signals. We compared the distributions of the times when the  
416 colonies, come above detection. Here, we saw indeed that colonies grown with quorum signals  
417 can come above detection later than colonies grown without (Figure 5c). When quorum signal  
418 mutants are subjected to quorum signals they can stay in lag phase longer (Boyle et al. 2015),  
419 and this may be what occurred here for the for WT bacteria growing in media with added  
420 quorum signals.

421 To see if this phenotype also played a role in the motile swarming model system, we  
422 searched for an increase in *rhlAB* expression in the motile swarms. Indeed, we found that adding  
423 both autoinducers to the media media accelerated the onset of swarming by ~30 minutes  
424 compared to swarms without supplemented autoinducers (Figure 6a).

425 With the observations that quorum signal perturbation leads to increased per capita gene  
426 expression in immotile colonies and earlier onset of tendrils formation, we asked if this  
427 perturbation could involve a fitness cost when the WT is in competition with an established

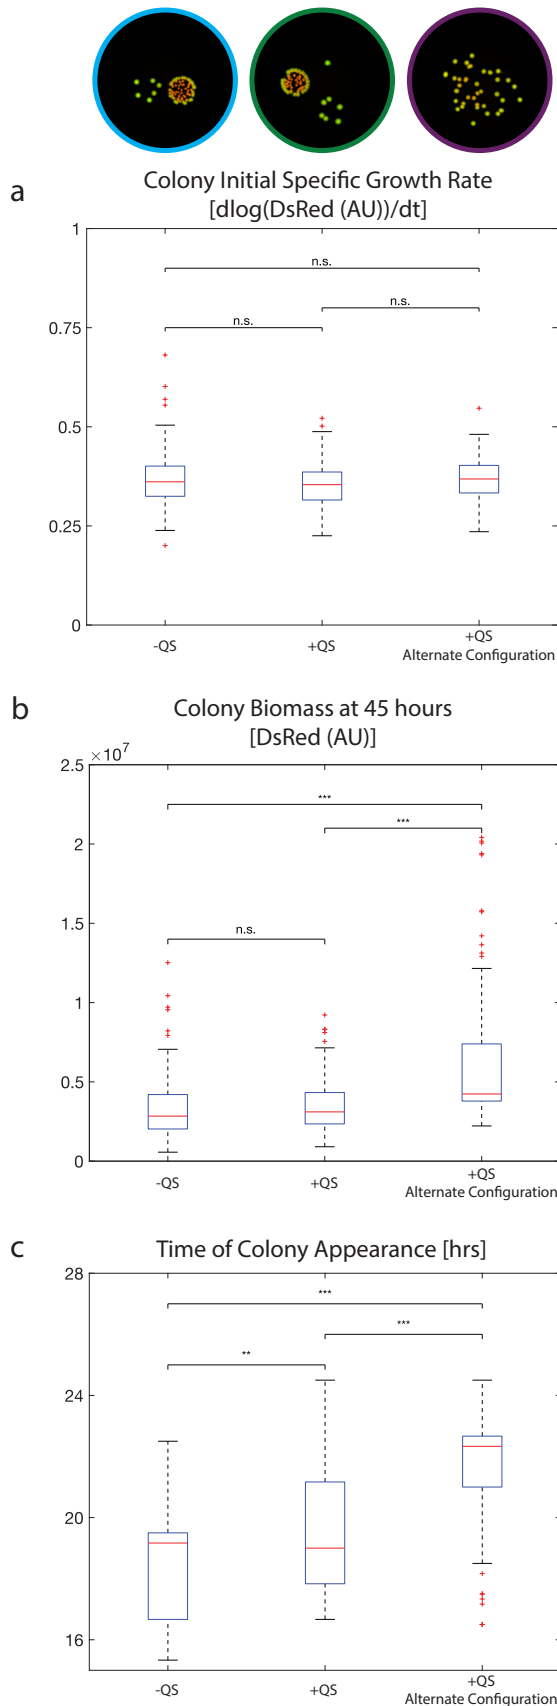

428

**Figure 5: Quorum signal perturbation reveals no growth impact**

429

430

431

432

433

434

435

436

437

438

439

440

441

442

443

444

445

446

447

448

449

450

451

452

453

454

455

456

457

458

459

460

461

462

463

**a.** Comparison of growth rate at the time of colony appearance with and without quorum signals in the media. Three biological replicates of three colony configurations were compared. Representative datasets pictured at the top. [Left configuration] colonies organized with high configuration variation. [Center configuration] colonies organized as in the left configuration, colonies perturbed with quorum signals in the media. [Right configuration] Colonies grown with low configuration variation, spread far apart on the plate. Media contains quorum signals at the same levels as the center configuration data. Colonies growth with or without quorum signals in the plate media show no difference in initial growth rate. Colonies grown at lower local density with quorum signals in plate media also show no difference in initial growth rate distribution. Colony identification algorithm was consistent across datasets [See Methods]. Significance measured by the Mann-Whitney test (See Supplemental Table 2).

**b.** Comparison of final colony biomass at 45 hours with the same 9 datasets as in A. Colonies grown with quorum signals in the media were found to have a similar size distribution to colonies grown without quorum signals in a similar colony configuration by the Mann-Whitney test. Colonies grown farther apart grow to larger final size. Quorum signal perturbation does not lead to any apparent growth cost we observe at 45 hours.

**c.** Comparison of time of colony appearance. Colonies grown without quorum signals are found to appear earlier than colonies grown with quorum signal. Significance measured by Mann-Whitney test.

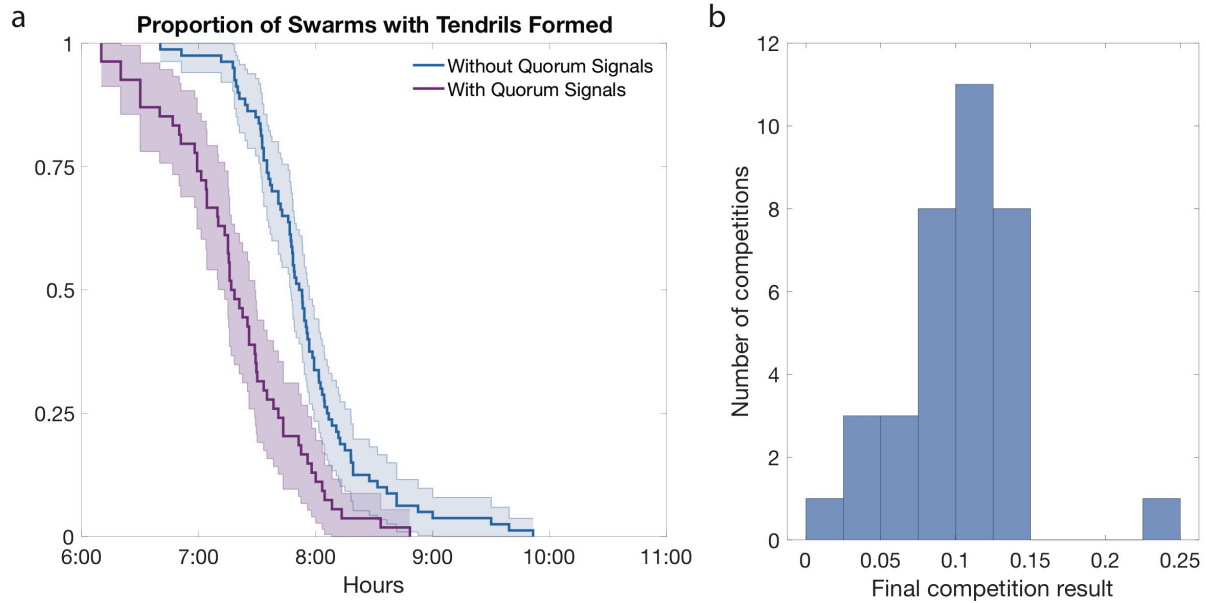

464

465 **Figure 6: Quorum Signal perturbation reveals accelerated cooperative behavior but no competitive**  
466 **disadvantage in mixes with rhamnolipid-deficient free riders**

467 **a.** Swarming start times with and without autoinducer in the plate media. No QS: 8 biological replicates with 80 total  
468 technical replicates. QS: 6 biological replicates with 54 total technical replicates. p-value <1e-8 by Kolmogorov-  
469 Smirnov test. **b.** WT PA14 was competed at a 1:1 ratio against the  $\Delta rhlA$  strain with quorum signals in the plate  
470 media (see methods). After competition for 24 hours the plates were washed and the cells diluted and counted by  
471 CFU. The change in the proportion of the WT strain (Final ratio WT/(Total Cell Number) – Initial Ratio (0.5)) at the  
472 conclusion of the competition is shown. Initial frequencies were recorded and final ratios calculated with respect to  
473 these. Data includes three biological replicates with several technical replicates in each. See Supplementary Table 3  
474 for initial ratios and final population sizes for each competition.

475



476 defector mutant (Xavier et al. 2011; de Vargas Roditi et al. 2013). Surprisingly, we saw no  
477 competitive cost to the WT when quorum signals were added to the swarming plate media  
478 (Figure 6b). Since there is no visible growth cost, we conclude that—despite our attempts to  
479 perturb *rhlAB* expression—swarming cooperation remains robust to cheating.

480

## 481 **Discussion**

482         Here, we used a combination of experimental and computational methods to advance our  
483 knowledge of *rhlAB* expression in a spatially-structured environment. We developed a novel  
484 high-throughput analysis, using fluorescence to track spatio-temporal bacterial growth and gene  
485 expression. The data produced showed that the gene expression in motile swarming *P.*  
486 *aeruginosa* colonies peaked at the tip of each tendril, a finding unexpected from our previous  
487 understanding of *rhlAB* expression (Figure 1). This phenotype emerged regardless of cell  
488 motility (Supplementary Figure 4). Further, we found that swarming tendrils, while expanding at  
489 a linear velocity, were able to maintain an exponential growth rate. This exponential growth rate  
490 is generated by a sustained growth rate throughout the tendril, not localized to the tendril edge as  
491 expected. This may be an example of navigated range expansion, following recent observations  
492 of growth dynamics in motile *E. coli* strains (Cremer et al, 2019).

493         To explore this unintuitive phenotype, non-motile colonies started from single cells  
494 provided a valuable model to study the communication between bacterial aggregates via  
495 diffusible compounds impacting gene expression and cooperative behavior. We found the  
496 immotile colony an underappreciated model that produced massive amounts of data to  
497 characterize growth and gene expression with spatial interaction (Figure 2). Even with classic

498 microbiology assays we believe new layers of regulation to bacterial behavior can be quantified,  
499 perturbed and characterized that were not present in the equivalent liquid culture experiments.

500 Our analysis not only revealed that *P. aeruginosa* colonies can communicate across  
501 centimeter scale distances (Figure 4), it showed that colony communication through the  
502 integration of growth and quorum signal information is capable of generating complex regions of  
503 both positive and negative interactions between colonies that further vary with the configuration  
504 of the cell aggregates and scale with the colony's growth rate (Figure 3). The kernels of  
505 interaction that we built from these data can be used to generate hypotheses of relevant length  
506 and growth timescales that may provide insight into the robustness of social interaction and  
507 cooperative phenotypes in natural bacterial communities.

508 Furthermore, the imaging infrastructure we have described allows for high throughput  
509 iteration between the immotile and motile systems. The volume of the data we were able to  
510 collect using immotile colonies allowed us to uncover a surface-linked perturbability to  
511 cooperative gene expression whereby the colonies are able to express *rhLAB* at levels previously  
512 uncharacterized by liquid culture experiments (Figure 4). Surface-induced gene expression has  
513 been seen before in biofilm polymer production and cell shape changes have been observed in  
514 the transition from planktonic life to swarming (Davies and Geesey 1995; Sauer et al. 2002;  
515 Kuchma and O'Toole 2000; Sauer and Camper 2001; McCarter and Silverman n.d.; Davies et al.  
516 1993; Harshey and Matsuyama 1994). However, these studies focus on the presence of gene  
517 expression in bacteria attached to surfaces or present in biofilms that wasn't present in liquid.  
518 *rhLAB* expression occurs regardless of surface or liquid environment in *P. aeruginosa*. In this  
519 study, we uncovered a new, surface-linked perturbability to *rhLAB* expression, giving a social

520 degree of freedom to the control of this cooperative behavior that becomes possible when cells  
521 are on a surface or moving in a swarm.

522 While our immotile colony data indicated there was no growth cost under social  
523 perturbation (Figure 5), work in the motile swarms indicated that this increased gene expression  
524 pattern played a role in the fully motile system (Figure 6a). This gives us a unique opportunity to  
525 ask if this behavior could play a role in the competitive motile system (Figure 6). Finding no  
526 competitive disadvantage to this increased expression pattern, we conclude this new regime of  
527 gene expression falls under the metabolic prudence regulation structure. However, we note that  
528 quorum signal perturbation likely has systemic effects and that the impact we observed on the  
529 time to tendrill formation in the swarms is likely dependent on more than rhamnolipid production  
530 alone.

531 To crystalize how *rhlAB* expression changes with both growth rate and social  
532 environment, we submit Figure 7 as a model for this system. Biomass (red) growth rate (black)  
533 and per capita gene expression (green) are representations of data previously presented and  
534 analyzed (Figure 1). The quorum signal curve (blue) is an approximation of the quorum signal  
535 field assuming a constant production rate with growth rate. The key elements to the integration  
536 of nutrient limitation and quorum signal concentration are as follows. When the cells are  
537 growing with a high growth rate, cells are more susceptible to perturbation by quorum signal  
538 (Figure 3c and Figure 4d). This means that when biomass is growing at a similar rate and with a  
539 similar amount of biomass, as can be seen in comparing the center of a swarm before tendrill  
540 formation (Figure 7a) with the tip of the tendrill at 12 hours (Figure 7b), the tip of the tendrill,  
541 exposed to a higher quorum signal concentration, will express more *rhlAB* per capita. This also  
542 means that when exposed to the same quorum signal levels but experiencing a difference in  
543

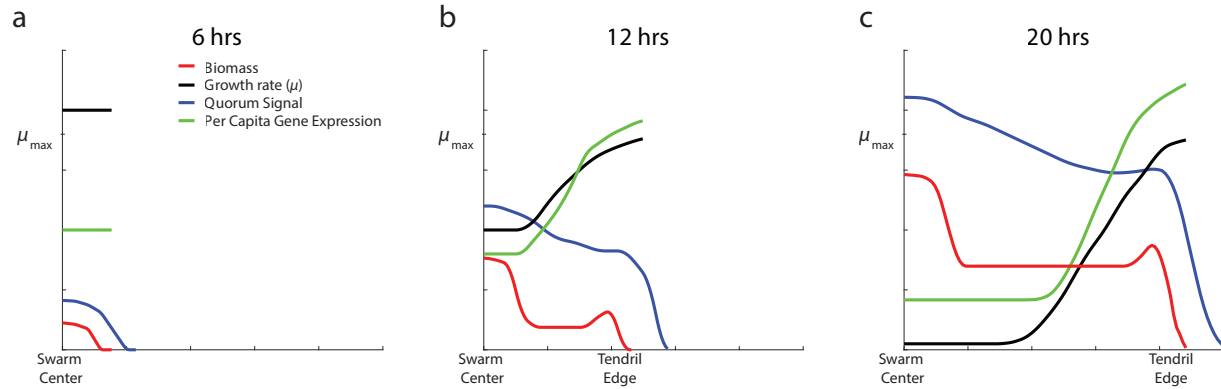

544

545 **Figure 7: The combination of nutrient information and quorum signals allows for the emergence of**  
546 **directionality**

547 Cartoon depicting three key timepoints in swarming tendril development. Cross sectional biomass density overlaid  
548 with distance dependent growth rate, quorum signal concentration and per capita *rhlAB* expression. **a.** At 6 hours, no  
549 tendrils have formed, biomass is largely localized at the original seeding location. Growth rates in the cells are high  
550 and quorum signals are less than maximal. Gene expression is uniform per unit of biomass throughout the  
551 population. **b.** At 12 hours, the tendril is moving at a constant velocity, growth is localized to the edge of the tendril  
552 and the biomass localizes at the tendril tip. Quorum signals continue to be produced in the center of the swarm, the  
553 rest of the tendril produces quorum signals proportional to the regions biomass level and growth rate. The gene  
554 expression that results is still moderate at the swarm center, but now highest at the tip of the tendril, correlating with  
555 the highest growth rate. **c.** At 20 hours, the tendril tip may be experiencing quorum signal levels similar to those of  
556 the center given a production rate proportional to the growth rate and diffusion of the signals. However, the  
557 comparatively high growth rate in this region allows a distinction between quorum signal levels accumulated over  
558 time (swarm center) and the resultant low gene expression, and quorum signal levels accumulated due to rapid  
559 growth and the corresponding high gene expression.

560

561 growth rate, cells growing at a slower rate will express less *rhlAB* per capita. This can be seen by  
562 comparing the gene expression at the slow-growing swarm center at 12 hours (Figure 7b) with  
563 the same quorum signal concentration experienced by the tip of the swarm tendril at 20 hours  
564 (Figure 7c). Taken together, a metabolically prudent basis for gene expression with high  
565 perturbability at high growth rate could explain the emergent directionality of *rhlAB* per capita  
566 gene expression that we observe experimentally.

567 Bacteria exist in complex social and spatial environments, but very little is known  
568 regarding cellular decision-making in these highly dynamic and spatially-driven environments.  
569 The basis of our understanding of bacterial behavior comes from studying regulation  
570 mechanisms thoroughly but in liquid culture. However, bacteria live mostly in spatially-  
571 structured environments. Experimental models such as *P. aeruginosa* swarms and even immotile  
572 colonies growing on hard agar allow us to study proximate molecular mechanisms and ultimate  
573 evolutionary questions in spatially structured communities (Yan et al 2019). Spatially structured  
574 environments are able to recapitulate a range of behavior in natural bacterial communities  
575 unattainable by liquid culture experiments. By iterating experimental and computational data-  
576 driven methods we demonstrate that the integration of quorum signal and nutrient limitation  
577 information in the metabolically prudent regulation of *rhlAB* can still let the tip of a swarming  
578 tendril emerge as a region of high cooperative gene expression. Further, we show that this gene  
579 expression control is robust to cheating across a much wider range of conditions than previously  
580 appreciated by liquid culture experiments. As many social behaviors take in diffusive inputs, this  
581 result may be generalizable to a wide range of social or cooperative phenotypes with surface-  
582 linked gene regulation that can already be assayed with classic microbiology techniques.

## 583 **Materials and Methods**

### 584 **Microbiological assays**

585           Plates were made with the recipe described in (Yan et al. 2019) with the addition of  
586 1.8mL of L-arabinose at 40% weight/volume for a concentration of 1.5%. Water was subtracted  
587 to compensate. Every plate has 20mL of agar media and was inspected visually to confirm a flat  
588 surface. Swarms were prepared as described in (Yan et al. 2019). Liquid culture assays were  
589 performed using casamino acid media prepared as in (Xavier et al. 2011). Data was acquired on a  
590 benchtop TECAN plate reader. The data was analyzed using custom software in MATLAB  
591 (Boyle et al. 2015).

592           All timeseries were imaged with prototype imaging setup, Canary (Supplemental Figure  
593 1). Fluorescent LEDs were used to light the sample. Data was collected by Atik VS14  
594 Fluorescent Camera through the Thorlabs filter wheel FW102C. Timeseries was collected  
595 through a custom-built control system using the Arduino Uno R3. Immotile colony timeseries  
596 were imaged every 10 minutes. Swarms were imaged every 5 minutes. Images taken in Canary  
597 were subject to uneven lighting due to the placement of the fluorescence LEDs (Supplementary  
598 Figure 1). To correct for this, multiple plates were imaged in Canary as well as on a flatbed  
599 scanner. We called this scanner data our ‘ground truth’. A correction was built from these images  
600 that allowed us to take each image generated in Canary and alter it to the evenly lit environment  
601 on the scanner. This correction was built manually by extracting features from the images. The  
602 data was validated on rotational datasets taken in Canary (Supplementary Figure 3). The final  
603 background correction is shown below. Parameters vary depending on the exact configuration of  
604 Canary though the terms remain consistent. The correction was updated as the instrument  
605 received upgrades and to control for variation in the L-arabinose batch used.

606

607

608 Min and max biomass and gene expression data full range boundaries from swarming

609 tendrils (Figures 1bc) was smoothed once with a moving window of 5 for visualization.

610 Background corrected pixel data is smoothed once with a moving window of 5 along the time

611 axis before pixel data is extracted and grouped into colony components. Colony Red data is

612 smoothed once with a moving window of 5 before exponential growth rates of the colonies are

613 calculated.

614 Unless noted otherwise, swarms and colonies provided exogenous quorum signals were

615 perturbed with the concentration of quorum signals determined to be present after 24 hours of

616 swarming (Xavier et al. 2011).

617

### 618 **Analysis of immotile colonies**

619 Cells were grown overnight in Casamino acid media and passaged into fresh Casamino

620 acid media for 2-4 hours to reach exponential phase. These cells were then triple washed, diluted

621 and spotted onto the agar such that every colony arises from a single cell. Colonies were plated

622 with motility-preventing agar concentrations as in the classic Colony Forming Unit (CFU) assay

623 (Figure 6a,b). The cells were fluorescently labeled for both biomass generation and rhamnolipid

624 investment. Biomass was tracked using DsRed(DC2) (Pfleger et al. 2005) under the control of

625 the PBad promoter induced by L-arabinose in the plate media (Figure 6c, Figure 2) (Newman

626 and Fuqua 1999). Rhamnolipid investment was tracked through the previously validated *PrhLAB*

627 -GFP promoter fusion (van Ditmarsch and Xavier 2011; Boyle et al. 2015).

628           The image timeseries post-processing was done in MATLAB R2018a (Supplemental  
629   Figures 3 and 5) and used to generate colony-centric growth, per capita gene expression  
630   information and all spatio-temporal features used in the text.

631           To supplement the identification of colonies, we developed a method to separate colonies  
632   that grow together and “merge” over the course of the timeseries so they could be tracked  
633   independently. After the images were background corrected, the peaks of the colonies were  
634   identified across a range of images and parameter values. The images used are between 20 and  
635   30 hours, before the majority of colony merge events. The best parameters for peak identification  
636   were selected and used in the downstream analysis.

637           Each complete image timeseries was used to create a mask with all pixels that will  
638   eventually contain biomass. Once identified, each pixel was tracked throughout the timeseries.  
639   To localize pixels to their cognate colony, the previously identified peaks, the mask and the  
640   biomass distribution in the final timepoint were used with the watershed algorithm to identify the  
641   boundaries of colony objects.

642           L2 (Ridge) regularization was performed with a 4-fold cross validation (Figure 3c).

643

#### 644   **Analysis of swarming colonies**

645           To determine the speed of a moving tendril, the location of the edge every 15 minutes  
646   between 12 and 20 hours was calculated and the data was smoothed with a moving window of  
647   1.25 hours. Swarms were imaged in a prototype imager equipped with a fish eye lens allowing  
648   for the acquisition of brightfield data for up to twelve swarming plates at a time. The timeseries  
649   were analyzed in ImageJ to identify the time of tendril formation. As the fish eye lens spreads the  
650   image pixels to cover a much larger region, the signal to noise ratio was managed carefully when



651 collecting these data. Tendril formation times for each plate were calculated at three different  
652 zoom levels and averaged. To avoid bias, the data for each plate was collected by at least two  
653 independent researchers before averaging.

654

## 655 **Acknowledgements**

656 The authors acknowledge Ned Wingreen, Chris Myers, Kyu Rhee, Dan Heller, Jinyuan  
657 Yan, Bradford P. Taylor and Chen Liao for helpful discussions and manuscript comments. This  
658 work was funded by National Science Foundation ([www.nsf.gov](http://www.nsf.gov)) award MCB- 1517002/NSF  
659 13-520 to JBX and a National Science Foundation Graduate Research Fellowship GRFP DGE-  
660 1257284 2012 to HM.

661

## 662 Bibliography

- 663  
664 Ben-Jacob, E., Cohen, I., Shochet, O., Tenenbaum, A., Czirók, A. and Vicsek, T. 1995.  
665 Cooperative formation of chiral patterns during growth of bacterial colonies. *Physical Review*  
666 *Letters* 75(15), pp. 2899–2902.
- 667 Ben-Jacob, E. and Garik, P. 1990. The formation of patterns in non-equilibrium growth. *Nature*  
668 343(6258), pp. 523–530.
- 669 Ben-Jacob, E., Schochet, O., Tenenbaum, A., Cohen, I., Czirók, A. and Vicsek, T. 1994. Generic  
670 modelling of cooperative growth patterns in bacterial colonies. *Nature* 368(6466), pp. 46–49.
- 671 Boyle, K.E., Monaco, H., van Ditmarsch, D., Deforet, M. and Xavier, J.B. 2015. Integration of  
672 metabolic and quorum sensing signals governing the decision to cooperate in a bacterial social  
673 trait. *PLoS Computational Biology* 11(5), p. e1004279.
- 674 Caiazza, N.C., Shanks, R.M.Q. and O’Toole, G.A. 2005. Rhamnolipids modulate swarming  
675 motility patterns of *Pseudomonas aeruginosa*. *Journal of Bacteriology* 187(21), pp. 7351–7361.
- 676 Connell, J.L., Kim, J., Shear, J.B., Bard, A.J. and Whiteley, M. 2014. Real-time monitoring of  
677 quorum sensing in 3D-printed bacterial aggregates using scanning electrochemical microscopy.  
678 *Proceedings of the National Academy of Sciences of the United States of America* 111(51), pp.  
679 18255–18260.
- 680 Connell, J.L., Wessel, A.K., Parsek, M.R., Ellington, A.D., Whiteley, M. and Shear, J.B. 2010.  
681 Probing prokaryotic social behaviors with bacterial “lobster traps”. *mBio* 1(4).
- 682 Cornforth, D.M., Popat, R., McNally, L., et al. 2014. Combinatorial quorum sensing allows  
683 bacteria to resolve their social and physical environment. *Proceedings of the National Academy*  
684 *of Sciences of the United States of America* 111(11), pp. 4280–4284.
- 685 Costerton, J.W., Stewart, P.S. and Greenberg, E.P. 1999. Bacterial biofilms: a common cause of  
686 persistent infections. *Science* 284(5418), pp. 1318–1322.
- 687 Darch, S.E., Simoska, O., Fitzpatrick, M., et al. 2018. Spatial determinants of quorum signaling  
688 in a *Pseudomonas aeruginosa* infection model. *Proceedings of the National Academy of Sciences*  
689 *of the United States of America* 115(18), pp. 4779–4784.
- 690 Davies, D.G., Chakrabarty, A.M. and Geesey, G.G. 1993. Exopolysaccharide production in  
691 biofilms: substratum activation of alginate gene expression by *Pseudomonas aeruginosa*. *Applied*  
692 *and Environmental Microbiology* 59(4), pp. 1181–1186.
- 693 Davies, D.G. and Geesey, G.G. 1995. Regulation of the alginate biosynthesis gene *algC* in  
694 *Pseudomonas aeruginosa* during biofilm development in continuous culture. *Applied and*  
695 *Environmental Microbiology* 61(3), pp. 860–867.
- 696 Deforet, M., Carmona-Fontaine, C., Korolev, K.S. and Xavier, J.B. 2019. Evolution at the edge  
697 of expanding populations. *The American Naturalist* 194(3), pp. 291–305.
- 698 Deng, P., de Vargas Roditi, L., van Ditmarsch, D. and Xavier, J.B. 2014. The ecological basis of  
699 morphogenesis: branching patterns in swarming colonies of bacteria. *New journal of physics* 16,  
700 pp. 015006–015006.
- 701 Déziel, E., Lépine, F., Milot, S. and Villemur, R. 2003. *rhlA* is required for the production of a  
702 novel biosurfactant promoting swarming motility in *Pseudomonas aeruginosa*: 3-(3-  
703 hydroxyalkanoyloxy)alkanoic acids (HAAs), the precursors of rhamnolipids. *Microbiology*  
704 149(Pt 8), pp. 2005–2013.
- 705 van Ditmarsch, D. and Xavier, J.B. 2011. High-resolution time series of *Pseudomonas*

- 706 aeruginosa gene expression and rhamnolipid secretion through growth curve synchronization.  
707 *BMC Microbiology* 11, p. 140.
- 708 Drescher, K., Nadell, C.D., Stone, H.A., Wingreen, N.S. and Bassler, B.L. 2014. Solutions to the  
709 public goods dilemma in bacterial biofilms. *Current Biology* 24(1), pp. 50–55.
- 710 Granato, E.T., Meiller-Legrand, T.A. and Foster, K.R. 2019. The evolution and ecology of  
711 bacterial warfare. *Current Biology* 29(11), pp. R521–R537.
- 712 Griffin, A.S., West, S.A. and Buckling, A. 2004. Cooperation and competition in pathogenic  
713 bacteria. *Nature* 430(7003), pp. 1024–1027.
- 714 Harshey, R.M. and Matsuyama, T. 1994. Dimorphic transition in *Escherichia coli* and  
715 *Salmonella typhimurium*: surface-induced differentiation into hyperflagellate swarmer cells.  
716 *Proceedings of the National Academy of Sciences of the United States of America* 91(18), pp.  
717 8631–8635.
- 718 Kim, W., Racimo, F., Schluter, J., Levy, S.B. and Foster, K.R. 2014. Importance of positioning  
719 for microbial evolution. *Proceedings of the National Academy of Sciences of the United States of*  
720 *America* 111(16), pp. E1639–47.
- 721 Kuchma, S.L. and O’Toole, G.A. 2000. Surface-induced and biofilm-induced changes in gene  
722 expression. *Current Opinion in Biotechnology* 11(5), pp. 429–433.
- 723 Latifi, A., Foglino, M., Tanaka, K., Williams, P. and Lazdunski, A. 1996. A hierarchical  
724 quorum-sensing cascade in *Pseudomonas aeruginosa* links the transcriptional activators LasR  
725 and RhlR (VsmR) to expression of the stationary-phase sigma factor RpoS. *Molecular*  
726 *Microbiology* 21(6), pp. 1137–1146.
- 727 Lee, H.H., Molla, M.N., Cantor, C.R. and Collins, J.J. 2010. Bacterial charity work leads to  
728 population-wide resistance. *Nature* 467(7311), pp. 82–85.
- 729 Lejeune, O., Tlidi, M. and Lefever, R. 2004. Vegetation spots and stripes: Dissipative structures  
730 in arid landscapes. *International journal of quantum chemistry* 98(2), pp. 261–271.
- 731 McCarter and Silverman MicroReview Surface-induced swarmer cell differentiation of *Vibrio*  
732 *parahaemolyticus*.
- 733 Medina, G., Juárez, K., Valderrama, B. and Soberón-Chávez, G. 2003. Mechanism of  
734 *Pseudomonas aeruginosa* RhlR transcriptional regulation of the rhlAB promoter. *Journal of*  
735 *Bacteriology* 185(20), pp. 5976–5983.
- 736 Mellbye, B. and Schuster, M. 2014. Physiological framework for the regulation of quorum  
737 sensing-dependent public goods in *Pseudomonas aeruginosa*. *Journal of Bacteriology* 196(6), pp.  
738 1155–1164.
- 739 Nadell, C.D., Bucci, V., Drescher, K., Levin, S.A., Bassler, B.L. and Xavier, J.B. 2013. Cutting  
740 through the complexity of cell collectives. *Proceedings. Biological Sciences / the Royal Society*  
741 280(1755), p. 20122770.
- 742 Nadell, C.D., Foster, K.R. and Xavier, J.B. 2010. Emergence of spatial structure in cell groups  
743 and the evolution of cooperation. *PLoS Computational Biology* 6(3), p. e1000716.
- 744 Newman, J.R. and Fuqua, C. 1999. Broad-host-range expression vectors that carry the L-  
745 arabinose-inducible *Escherichia coli* araBAD promoter and the araC regulator. *Gene* 227(2), pp.  
746 197–203.
- 747 Ochsner, U.A., Koch, A.K., Fiechter, A. and Reiser, J. 1994. Isolation and characterization of a  
748 regulatory gene affecting rhamnolipid biosurfactant synthesis in *Pseudomonas aeruginosa*.  
749 *Journal of Bacteriology* 176(7), pp. 2044–2054.
- 750 Ochsner, U.A. and Reiser, J. 1995. Autoinducer-mediated regulation of rhamnolipid  
751 biosurfactant synthesis in *Pseudomonas aeruginosa*. *Proceedings of the National Academy of*

752 *Sciences of the United States of America* 92(14), pp. 6424–6428.  
753 Pearson, J.P., Pesci, E.C. and Iglewski, B.H. 1997. Roles of *Pseudomonas aeruginosa* las and rhl  
754 quorum-sensing systems in control of elastase and rhamnolipid biosynthesis genes. *Journal of*  
755 *Bacteriology* 179(18), pp. 5756–5767.  
756 Pflieger, B.F., Fawzi, N.J. and Keasling, J.D. 2005. Optimization of DsRed production in  
757 *Escherichia coli*: effect of ribosome binding site sequestration on translation efficiency.  
758 *Biotechnology and Bioengineering* 92(5), pp. 553–558.  
759 Rietkerk, M., Boerlijst, M.C., van Langevelde, F., et al. 2002. Self-organization of vegetation in  
760 arid ecosystems. *The American Naturalist* 160(4), pp. 524–530.  
761 Rietkerk, M., Dekker, S.C., de Ruiter, P.C. and van de Koppel, J. 2004. Self-organized  
762 patchiness and catastrophic shifts in ecosystems. *Science* 305(5692), pp. 1926–1929.  
763 Rutherford, S.T. and Bassler, B.L. 2012. Bacterial quorum sensing: its role in virulence and  
764 possibilities for its control. *Cold Spring Harbor perspectives in medicine* 2(11).  
765 Sauer, K. and Camper, A.K. 2001. Characterization of phenotypic changes in *Pseudomonas*  
766 *putida* in response to surface-associated growth. *Journal of Bacteriology* 183(22), pp. 6579–  
767 6589.  
768 Sauer, K., Camper, A.K., Ehrlich, G.D., Costerton, J.W. and Davies, D.G. 2002. *Pseudomonas*  
769 *aeruginosa* displays multiple phenotypes during development as a biofilm. *Journal of*  
770 *Bacteriology* 184(4), pp. 1140–1154.  
771 Singh, P.K., Schaefer, A.L., Parsek, M.R., Moninger, T.O., Welsh, M.J. and Greenberg, E.P.  
772 2000. Quorum-sensing signals indicate that cystic fibrosis lungs are infected with bacterial  
773 biofilms. *Nature* 407(6805), pp. 762–764.  
774 Smith, P. and Schuster, M. 2019. Public goods and cheating in microbes. *Current Biology*  
775 29(11), pp. R442–R447.  
776 de Vargas Roditi, L., Boyle, K.E. and Xavier, J.B. 2013. Multilevel selection analysis of a  
777 microbial social trait. *Molecular Systems Biology* 9, p. 684.  
778 Velicer, G.J. and Vos, M. 2009. Sociobiology of the myxobacteria. *Annual Review of*  
779 *Microbiology* 63, pp. 599–623.  
780 Wagner, V.E., Bushnell, D., Passador, L., Brooks, A.I. and Iglewski, B.H. 2003. Microarray  
781 analysis of *Pseudomonas aeruginosa* quorum-sensing regulons: effects of growth phase and  
782 environment. *Journal of Bacteriology* 185(7), pp. 2080–2095.  
783 Xavier, J.B., Kim, W. and Foster, K.R. 2011. A molecular mechanism that stabilizes cooperative  
784 secretions in *Pseudomonas aeruginosa*. *Molecular Microbiology* 79(1), pp. 166–179.  
785 Yan, J., Monaco, H. and Xavier, J.B. 2019. The ultimate guide to bacterial swarming: an  
786 experimental model to study the evolution of cooperative behavior. *Annual Review of*  
787 *Microbiology* 73, pp. 293–312.  
788 Zhu, K. and Rock, C.O. 2008. RhlA converts beta-hydroxyacyl-acyl carrier protein intermediates  
789 in fatty acid synthesis to the beta-hydroxydecanoyl-beta-hydroxydecanoate component of  
790 rhamnolipids in *Pseudomonas aeruginosa*. *Journal of Bacteriology* 190(9), pp. 3147–3154.  
791  
792  
793
